# Supplementary material
Source: publisher site journal article supplement (https://static.cambridge.org/content/id/urn:cambridge.org:id:article:S1474746419000150/resource/name/S1474746419000150supp001.docx)
Supplement: Supplementary file 1 [file S1474746419000150supp001.docx]

**Supplementary Material**

Web Table A1 Respondent and household characteristics.

|  | **Total sample (n=598)** | |
| --- | --- | --- |
|  | **n** | **%** |
| **Respondent gender** |  |  |
| Male | 307 | 51.5 |
| Female | 289 | 49.5 |
| **Respondent age** |  |  |
| 18 to 24 | 70 | 11.7 |
| 25 to 34 | 159 | 26.6 |
| 35 to 49 | 251 | 42.0 |
| 50 to 64 | 107 | 17.9 |
| 65+ | 10 | 1.67 |
| **Respondent marital status** |  |  |
| Single | 343 | 57.7 |
| Living with a partner or spouse | 148 | 24.9 |
| Separated from husband/wife/partner | 47 | 7.9 |
| Divorced | 49 | 8.2 |
| Widowed | 8 | 1.3 |
| **Household type** |  |  |
| Single adult (living alone or with non-household members) | 288 | 48.2 |
| Lone parent family with dependent or non-dependent children | 141 | 23.6 |
| Couple with dependent or non-dependent children | 65 | 10.9 |
| Couple family without dependent or non-dependent children | 30 | 5.0 |
| Multi-family household | 29 | 4.9 |
| Single adult or couple living with siblings or other adults | 13 | 2.2 |
| Living with unspecified household members | 32 | 5.4 |
| **Respondent education level** |  |  |
| No formal qualifications | 198 | 33.1 |
| GCSE / O level | 253 | 42.3 |
| AS/A level | 22 | 3.68 |
| Diploma or equivalent | 75 | 12.5 |
| First degree-level qualification (i.e. from university) | 22 | 3.68 |
| Postgraduate or higher degree, diploma or certificate | 11 | 1.84 |
| Other higher education courses | 8 | 1.34 |
| Missing | 9 | 1.51 |
| **Immigration status** |  |  |
| Born in the UK | 526 | 88.1 |
| Immigrated <5 years ago | 12 | 2.0 |
| Immigrated 5+ years ago | 37 | 6.2 |
| Seeking asylum | 22 | 3.7 |
| **Employment status of adults in household** |  |  |
| Adults only working | 46 | 7.69 |
| Adults only unemployed | 161 | 26.9 |
| Adults only caregiving | 34 | 5.69 |
| Adults only unable to work due to illness | 158 | 26.4 |
| Adults only unable to work for other reasons | 32 | 5.34 |
| Mixed economic inactivity and unemployment | 81 | 13.6 |
| Mixed economic inactivity, unemployment and working | 33 | 5.52 |
| Missing | 53 | 8.86 |
| **Household food insecurity status** |  |  |
| Food secure | 6 | 1.00 |
| Marginal food insecurity | 7 | 1.17 |
| Moderate food insecurity | 55 | 9.20 |
| Severe food insecurity | 469 | 78.4 |
| Missing | 61 | 10.2 |

*Notes:* Data are unweighted n and column proportions. Columns do not sum to 100 due to missing values not shown.

Web Table A2 Odds of household reporting difficulty affording rent*.

|  | Odds of reporting difficulty affording rent (95 per cent confidence interval) |
| --- | --- |
| Current housing |  |
| Socially rented | Referent |
| Privately rented | 1.66 (0.95-2.90) |
| In receipt of housing benefit |  |
| No | Referent |
| Yes | 0.47 (0.23-0.96) |
| Equivalised income (per £1 increase in last month) | 1.00 (0.99-1.00) |

*n=236 households currently paying rent and who completed questionnaire in first data collection period (Oct-Dec 2016)
